# Supplementary material for: Limiting Postpartum Weight Retention in Culturally and Linguistically Diverse Women: Secondary Analysis of the HeLP-her Randomized Controlled Trial
Source: MDPI journal article supplement (doi:10.3390/nu14142988), 2022-07-21
Supplement: s1 [file s1]

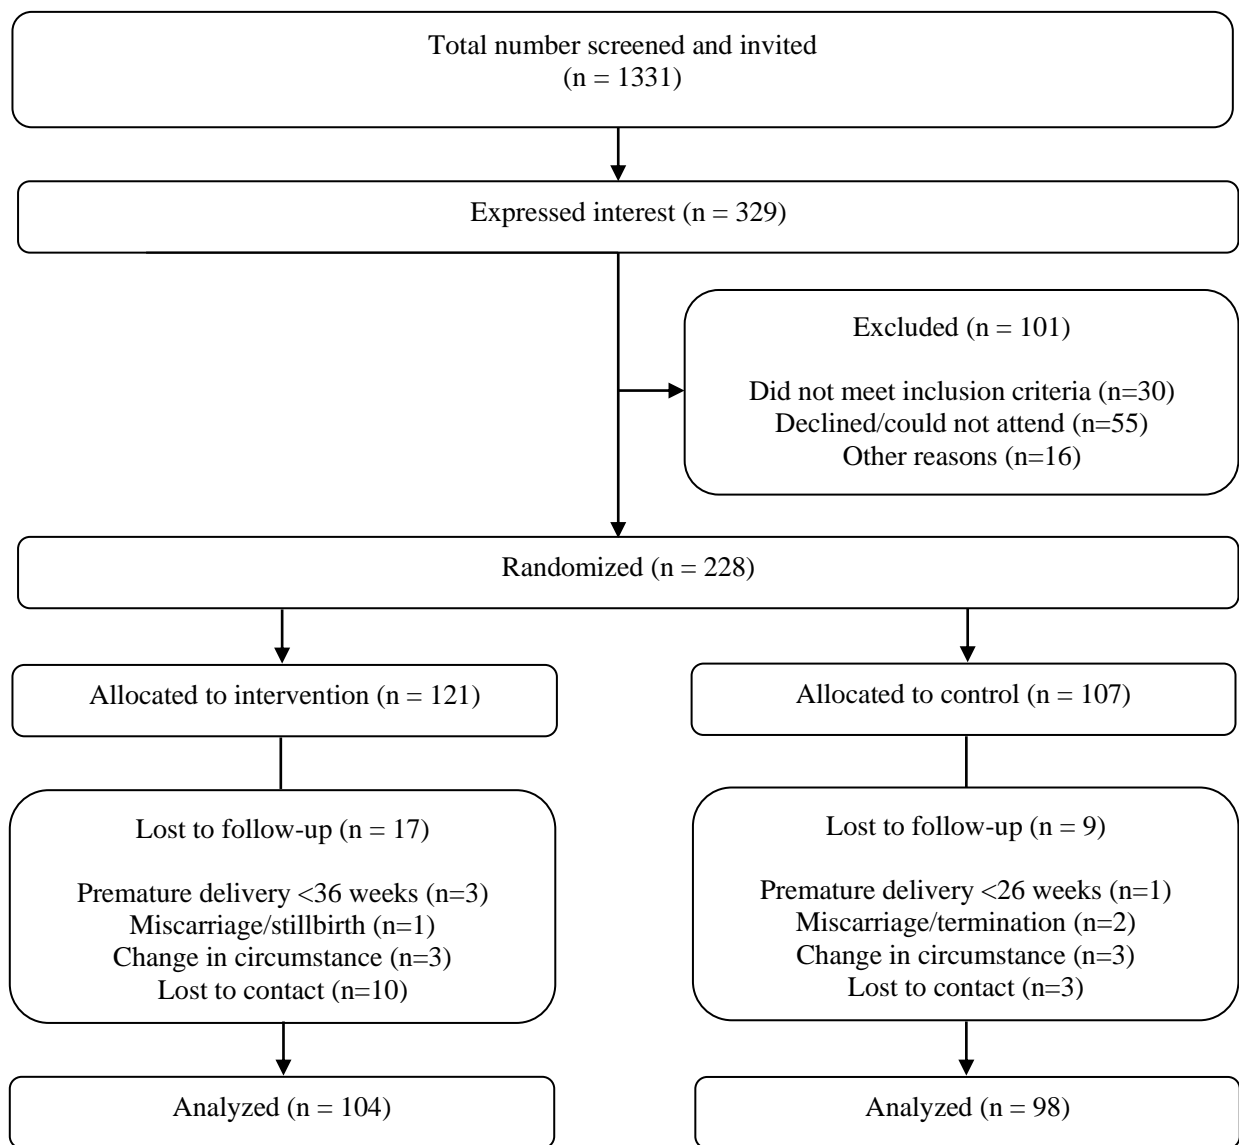

Figure S1. CONSORT diagram

Table S1. Intervention effect on weight change (kg) from baseline to 6 weeks postpartum according to country of birth and baseline BMI

|                     | Intervention |            | Control |            | <i>P</i> value |
|---------------------|--------------|------------|---------|------------|----------------|
|                     | n            | Mean±SD    | n       | Mean±SD    |                |
| Australian-born     |              |            |         |            |                |
| Overweight          | 9            | -1.17±2.45 | 11      | 0.47±4.93  | 0.376          |
| Obesity             | 30           | -0.43±5.42 | 26      | -1.26±5.33 | 0.567          |
| Non-Australian-born |              |            |         |            |                |
| Overweight          | 50           | 1.97±3.92  | 49      | 3.98±5.53  | 0.040          |
| Obesity             | 15           | -1.42±3.77 | 12      | 2.03±5.03  | 0.052          |

BMI, body mass index; SD, standard deviation.

Table S2. Univariate regression analysis for predictors of weight change (kg) from baseline to 6 weeks postpartum

| Variables                                                          | Australian-born      |                | Non-Australian-born  |                |
|--------------------------------------------------------------------|----------------------|----------------|----------------------|----------------|
|                                                                    | $\beta$ (95%CI)      | <i>P</i> value | $\beta$ (95%CI)      | <i>P</i> value |
| <b>Group</b>                                                       |                      |                |                      |                |
| Intervention (vs. control)                                         | 0.14 (-2.16, 2.45)   | 0.901          | -2.41 (-4.11, -0.71) | 0.006          |
| <b>Demographics</b>                                                |                      |                |                      |                |
| Age (years)                                                        | -0.14 (-0.40, 0.13)  | 0.303          | -0.40 (-0.58, -0.22) | <0.001         |
| Education                                                          |                      |                |                      |                |
| Certificate/diploma (vs. high school or below)                     | 2.29 (-0.59, 5.17)   | 0.118          | -2.02 (-5.10, 1.07)  | 0.198          |
| Bachelor degree or higher (vs. high school or below)               | 1.39 (-1.77, 4.54)   | 0.384          | 0.18 (-2.54, 2.90)   | 0.895          |
| Work                                                               |                      |                |                      |                |
| Full-time (vs. no paid work)                                       | 1.35 (-1.90, 4.61)   | 0.410          | 0.98 (-1.13, 3.09)   | 0.361          |
| Part-time (vs. no paid work)                                       | 2.24 (-0.46, 4.95)   | 0.103          | -0.10 (-2.39, 2.18)  | 0.929          |
| Household income                                                   |                      |                |                      |                |
| \$40,000-80,000 (vs. <\$40,000)                                    | -0.69 (-4.02, 2.63)  | 0.677          | -0.74 (-2.93, 1.45)  | 0.505          |
| >\$80,000 (vs. <\$40,000)                                          | -1.57 (-5.06, 1.92)  | 0.373          | -2.16 (-4.95, 0.62)  | 0.127          |
| Parity                                                             |                      |                |                      |                |
| Multiparous (vs. primiparous)                                      | 1.23 (-1.35, 3.82)   | 0.345          | -3.78 (-5.43, -2.14) | <0.001         |
| Current breastfeeding                                              |                      |                |                      |                |
| Yes (vs. no)                                                       | -1.09 (-4.24, 2.07)  | 0.493          | 1.98 (-2.41, 6.37)   | 0.373          |
| <b>Anthropometrics</b>                                             |                      |                |                      |                |
| Obesity (vs. overweight)                                           | -0.55 (-3.17, 2.06)  | 0.675          | -2.85 (-4.92, -0.78) | 0.007          |
| <b>Behavioral</b>                                                  |                      |                |                      |                |
| Physical activity change (1000 steps/day)                          | -0.02 (-0.12, 0.08)  | 0.723          | -0.19 (-0.40, 0.02)  | 0.081          |
| Fat-related dietary behaviors change <sup>a</sup>                  | -4.19 (-12.20, 3.81) | 0.296          | 0.49 (-2.87, 3.86)   | 0.771          |
| Postpartum self-weighing                                           |                      |                |                      |                |
| Frequent (vs. not frequent)                                        | -0.97 (-3.84, 1.91)  | 0.503          | -1.17 (-3.20, 0.86)  | 0.255          |
| <b>Psychosocial</b>                                                |                      |                |                      |                |
| Baseline perceived risk of excess GWG (vs. no)                     | 1.38 (-2.62, 5.39)   | 0.492          | -0.66 (-3.03, 1.72)  | 0.585          |
| Baseline perceived risk of GDM (vs. no)                            | -1.44 (-4.35, 1.47)  | 0.327          | -0.62 (-2.78, 1.53)  | 0.566          |
| Weight control confidence change <sup>b</sup>                      | 0.30 (-0.56, 1.17)   | 0.479          | -0.33 (-0.87, 0.21)  | 0.227          |
| Exercise self-efficacy change <sup>c</sup>                         |                      |                |                      |                |
| Sticking to it                                                     | 0.16 (-1.69, 2.00)   | 0.865          | 0.68 (-0.69, 2.05)   | 0.326          |
| Making time for exercise                                           | 0.17 (-1.73, 2.07)   | 0.859          | -0.69 (-2.08, 0.69)  | 0.323          |
| Eating self-efficacy change <sup>c</sup>                           |                      |                |                      |                |
| Sticking to it                                                     | 0.22 (-2.08, 2.52)   | 0.846          | -1.22 (-2.29, -0.14) | 0.027          |
| Reducing calories                                                  | -0.37 (-2.67, 1.94)  | 0.750          | -0.78 (-2.07, 0.51)  | 0.232          |
| <b>Others</b>                                                      |                      |                |                      |                |
| Perceived change to physical activity (vs. no)                     | 0.25 (-2.78, 3.29)   | 0.867          | 0.11 (-2.36, 2.58)   | 0.930          |
| Increased number of regular physical activity sessions (vs. no)    | -2.10 (-5.08, 0.88)  | 0.164          | -0.24 (-2.55, 2.07)  | 0.836          |
| Increased time spent on physical activity sessions (vs. no)        | -4.97 (-9.41, -0.53) | 0.029          | 1.76 (-2.01, 5.53)   | 0.357          |
| Increased physical intensity of exercise sessions (vs. no)         | -1.02 (-7.40, 5.35)  | 0.748          | -1.23 (-5.65, 3.19)  | 0.583          |
| Perceived change to diet (vs. no)                                  | 2.31 (-1.98, 6.61)   | 0.286          | -3.10 (-5.99, -0.22) | 0.035          |
| Increased fruit and vegetable consumption (vs. no)                 | 1.83 (-1.07, 4.74)   | 0.212          | -2.03 (-4.18, 0.12)  | 0.065          |
| Increased low fat dairy products (vs. no)                          | -0.43 (-3.59, 2.74)  | 0.788          | -0.28 (-2.34, 1.79)  | 0.791          |
| Decreased fruit juice, cordial and soft drink consumption (vs. no) | -3.20 (-6.53, 0.12)  | 0.059          | -2.08 (-4.14, -0.02) | 0.048          |
| Decreased intake of snack foods (vs. no)                           | -0.55 (-3.50, 2.39)  | 0.708          | -2.74 (-4.74, -0.73) | 0.008          |
| Decreased takeaway and convenience foods (vs. no)                  | 2.03 (-0.85, 4.92)   | 0.163          | -1.39 (-3.49, 0.71)  | 0.192          |

CI, confidence interval; GWG, gestational weight gain; GDM, gestational diabetes mellitus.

<sup>a</sup> 1=usually choose low fat; 3=rarely or never choose low fat.

<sup>b</sup> 1=not at all confident; 10=totally confident.

<sup>c</sup> 1=not at all confident; 5=extremely confident.

Table S3. Multivariable regression analysis for predictors of weight change (kg) from baseline to 6 weeks postpartum

| Variables                                                   | $\beta$ (95%CI)       | <i>P</i> value |
|-------------------------------------------------------------|-----------------------|----------------|
| Australian-born                                             |                       |                |
| Intervention (vs. control)                                  | -0.40 (-3.46, 2.65)   | 0.792          |
| Age (years)                                                 | -0.08 (-0.44, 0.27)   | 0.643          |
| Multiparous (vs. primiparous)                               | 1.21 (-2.15, 4.58)    | 0.472          |
| Obesity (vs. overweight)                                    | -0.66 (-4.03, 2.70)   | 0.693          |
| Increased time spent on physical activity sessions (vs. no) | -5.22 (-10.06, -0.37) | 0.035          |
| Non-Australian-born                                         |                       |                |
| Intervention (vs. control)                                  | -1.99 (-3.95, -0.03)  | 0.047          |
| Age (years)                                                 | -0.22 (-0.46, 0.02)   | 0.076          |
| Multiparous (vs. primiparous)                               | -1.89 (-3.94, 0.16)   | 0.070          |
| Obesity (vs. overweight)                                    | -0.43 (-2.77, 1.92)   | 0.717          |
| Decreased intake of snack foods (vs. no)                    | -2.21 (-4.25, -0.17)  | 0.034          |

CI, confidence interval.
